# Supplementary material
Source: publisher figshare collection journal article supplement (https://gsajournals.figshare.com/articles/dataset/_/8306144)

# Supplemental data Figure S1

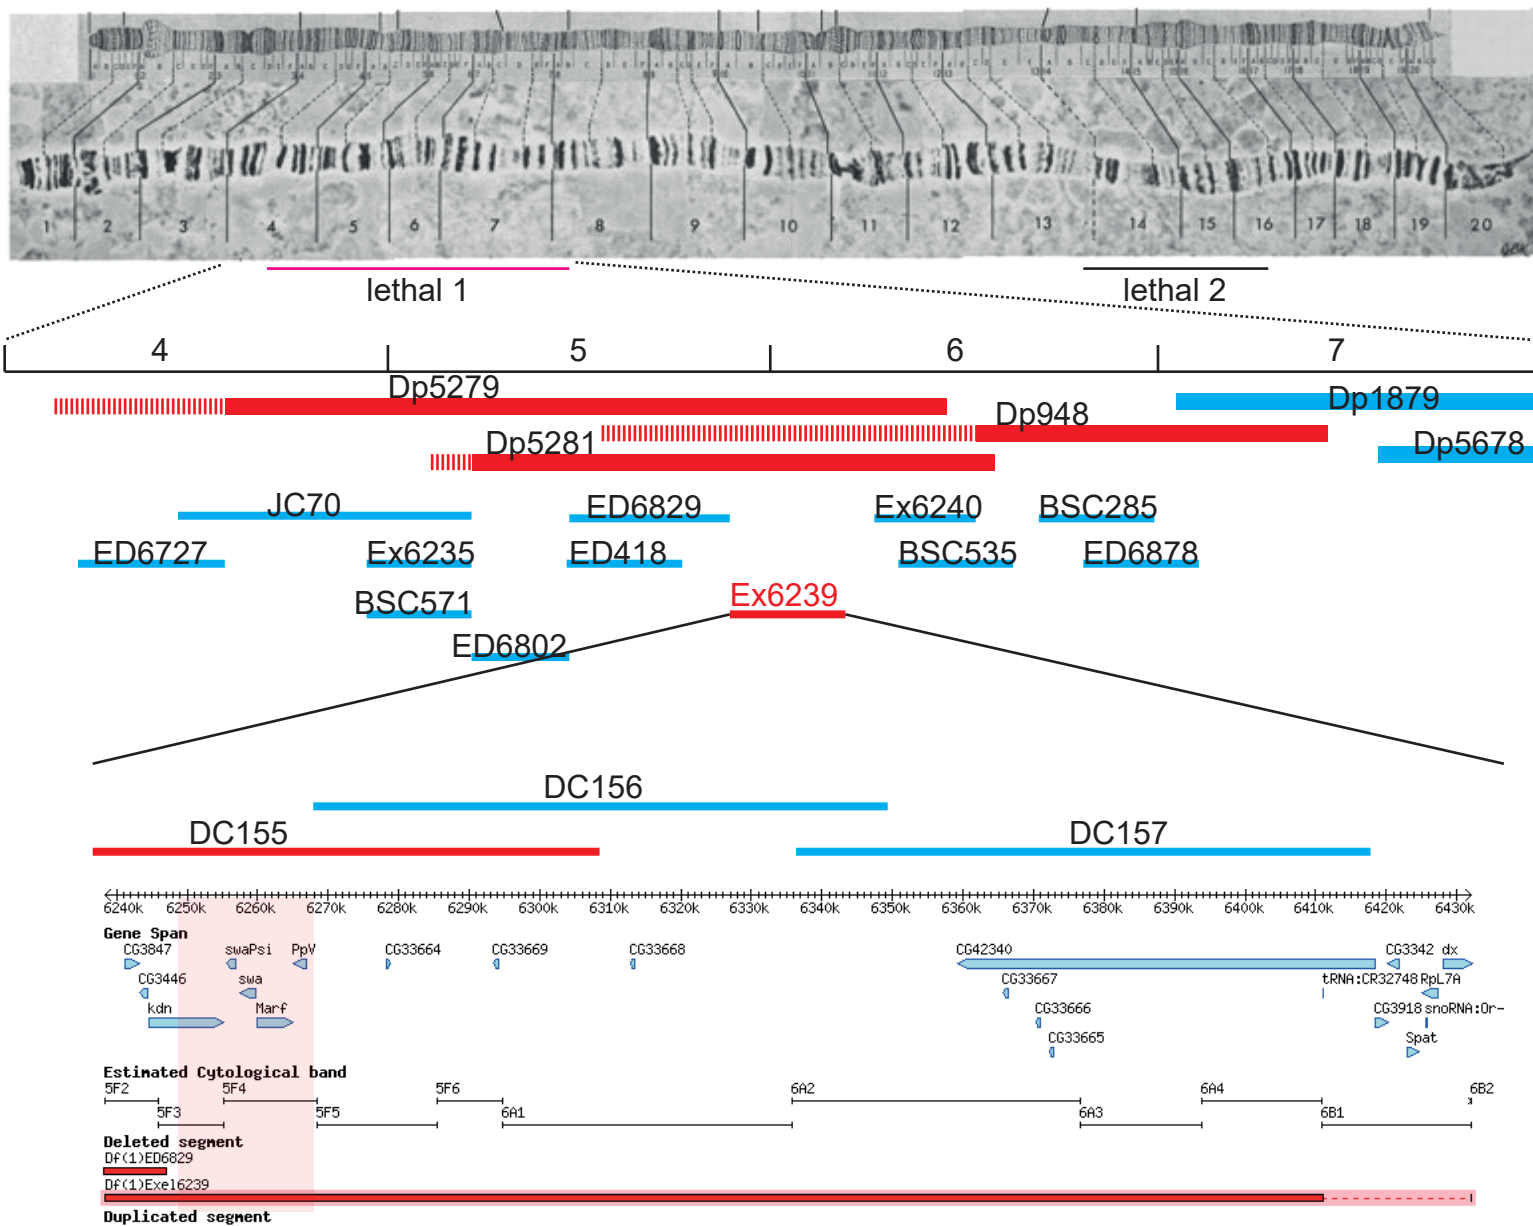

## Supplemental data Figure S2

### A Maternal germline clone lethality

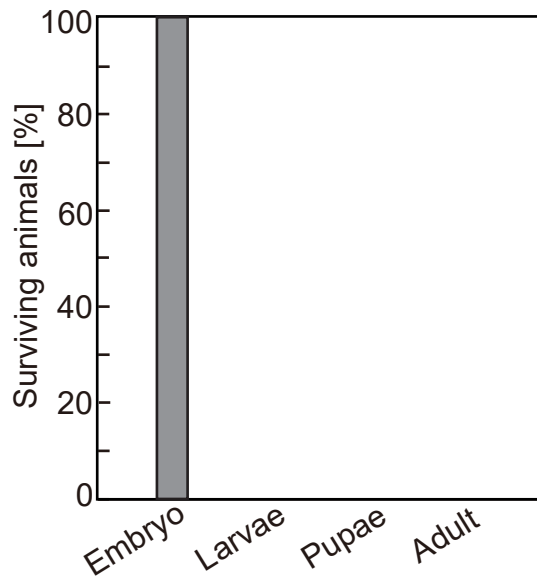

### B Zygotic lethality

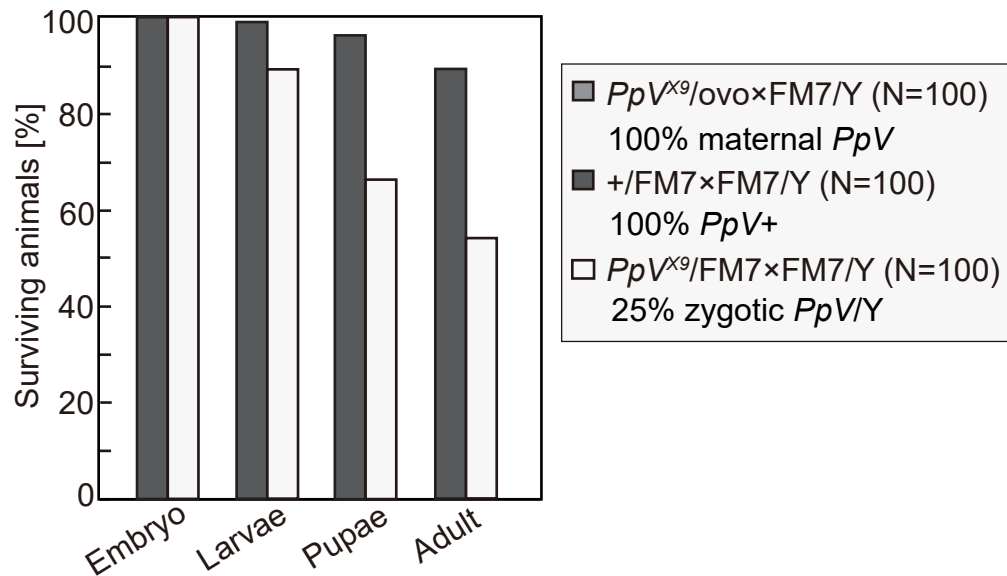

Supplemental data Figure S3

A

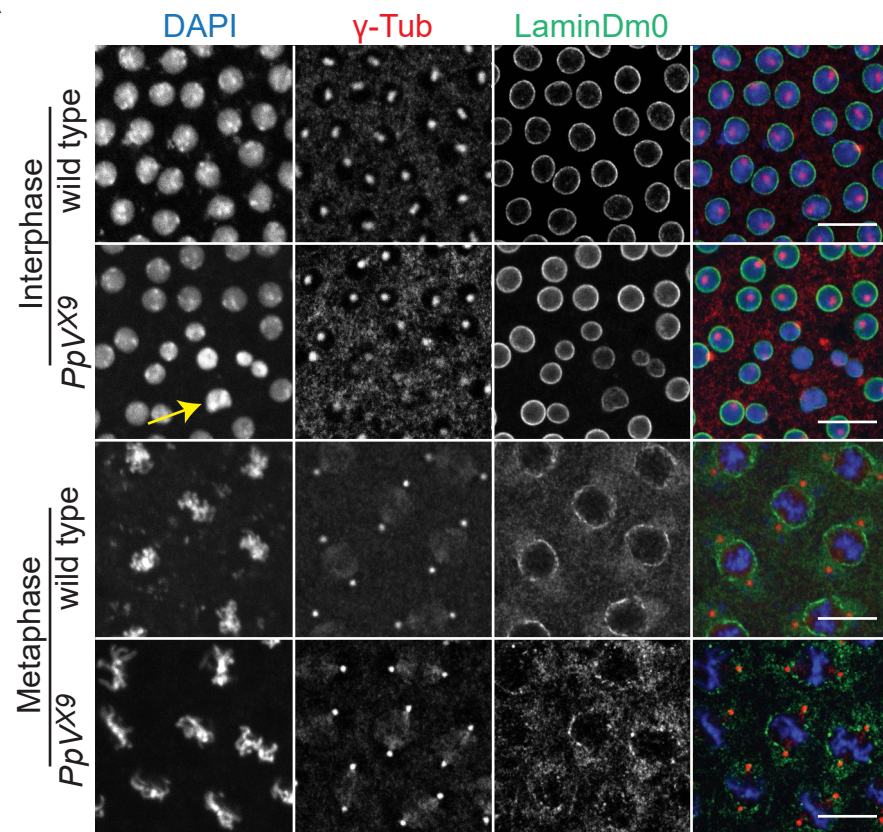

B

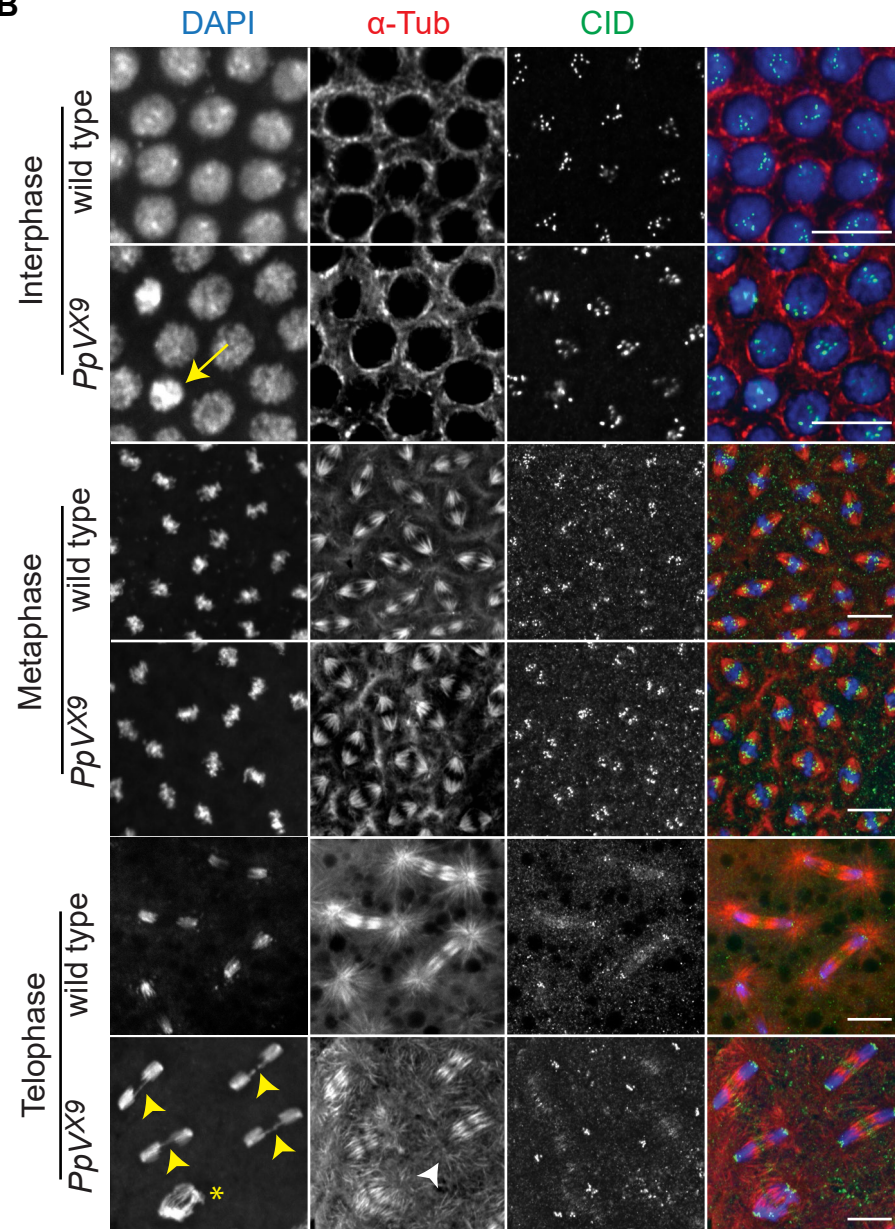

# Supplemental data Figure S4

*PpV*

Wild type

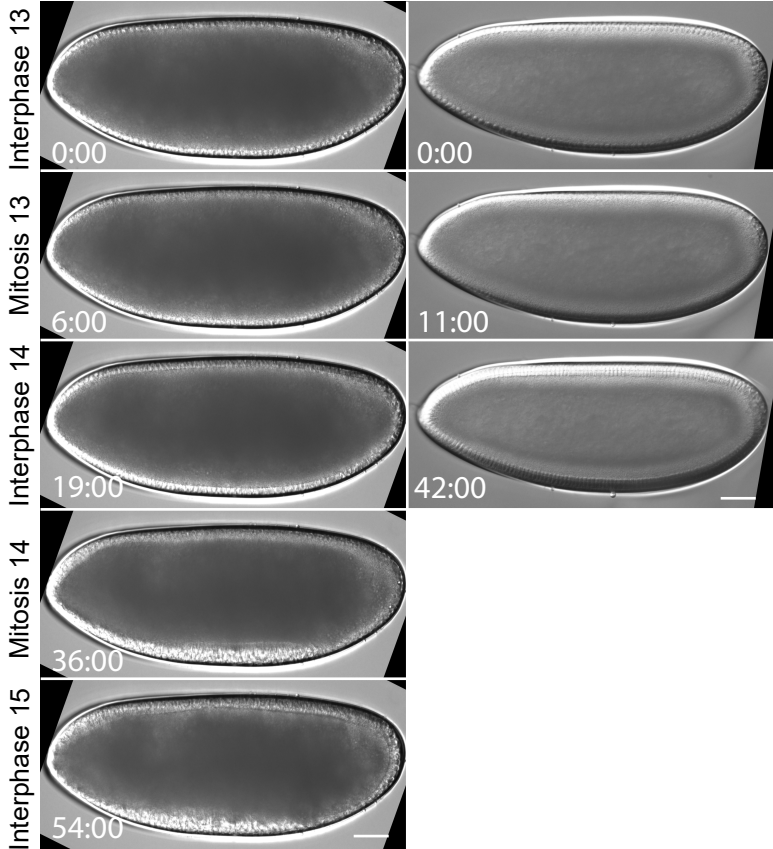



## Supplemental data Figure S5

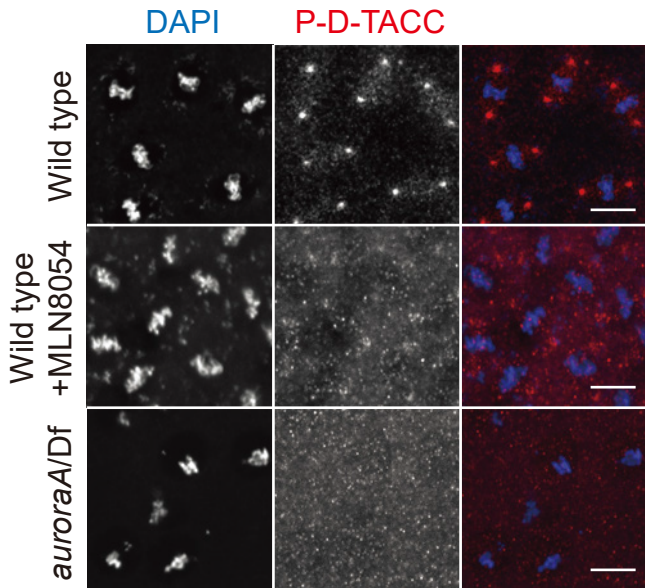

## Supplemental data Figure S6

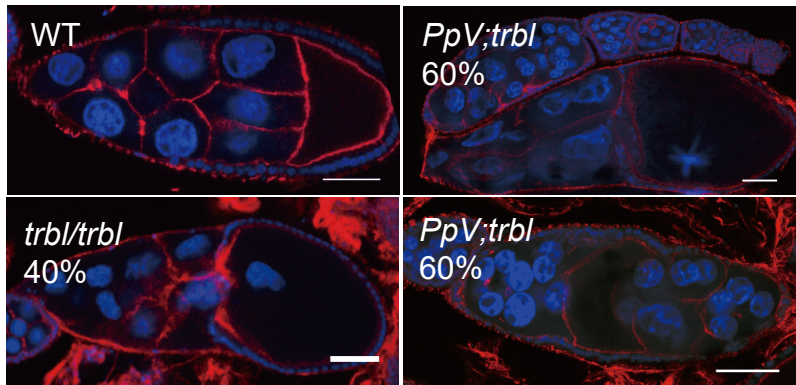

Supplement: Supplementary file 1 [file 1]
