# Supplementary material
Source: publisher figshare collection journal article supplement (https://gsajournals.figshare.com/articles/dataset/_/8306144)
Supplement: Supplementary file 1 [file 1]

## Sheet: Figure 2
control	WT/WT	nlsGFP/nlsGFP		X9	X9/X9	nlsGFP/nlsGFP
image 2	8	5		image 8	51	56
image 3	8	11		image 9	25	32
image 4	32	40		image 11	79	48
image 5	20	22		image 12	15	30
image 6	17	20		image 13	22	19
image 7	37	45		image 14	18	61
image 8	35	26		image 15	20	22
				image 16	16	14
				image 17	73	76

## Sheet: Figure 4
Quantification of cell cycle length
WT							X9 14div								X9 13div
embryo	NC10	NC11	NC12	NC13			embryo	NC10	NC11	NC12	NC13	NC14			embryo	NC10	NC11	NC12	NC13
1		10	16	20	min		1	14	16	19	27	27	min		1	12	14	18	21	min
2	10	13	16	27			2		13	16	20	31			2				32
3		12	14	21			3	11	15	16	20	29			3		12	16	26
4			13	22			4		12	14	19	25			4				28
5		11	15	22			5		12	15	23	25
Mean	10	11.5	14.8	22.4				12.5	13.6	16	21.8	27.4				12	13	17	26.75
SD	0	1.11803	1.16619	2.41661				1.5	1.62481	1.67332	2.92575	2.33238				0	1	1	3.96074
NC nuclear cycle
SD standard deviation
Quantification of nuclei density				Number of nuclei in 100µm2
WT							X9 14div							X9 13div
embryo	NC12	NC13	NC14				embryo	NC12	NC13	NC14	NC15			embryo	NC12	NC13	NC14
1	0.8	1.58	2.98				1	0.6	1.02	1.44	2.2			1	0.6	1.18	2.02
2	0.8	1.44	2.68				2	0.52	0.96	1.9	2.22			2	0.62	1.22	1.98
3	0.84	1.58	2.84				3	0.48	0.76	1.54	2.16			3		1.26	1.88
4	0.74	1.62	2.68				4	0.56	1	1.7	1.9			4	0.36	0.68	1.28
Mean	0.795	1.555	2.795				5		0.94	1.42	1.1			5	0.62	0.96	1.58
SD	0.0412311	0.0789515	0.144568				6	0.54	0.98	1.54	1.46			6	0.58	1.08	1.32
							Mean	0.54	0.943333	1.59	1.84			Mean	0.556	1.06333	1.67667
							SD	0.0447214	0.094163	0.181439	0.463033			SD	0.110815	0.216672	0.330192

## Sheet: Figure 6
WT	Number of WT clones	Number of GFP clones		PpV	Number of PpV clones	Number of GFP clones
Image1	49	46		Image14	22	27
Image2	16	14		Image15	16	19
Image3	23	28		Image18	19	30
Image5	25	23		Image21	18	13
Image6	22	18		Image22	15	20
Image7	56	62		Image24	13	17
Image27	174	278		Image12	138	271
Image24	230	312		Image19	169	197
				Image20	74	79

## Sheet: Figure 7
WT	<14NC	14NC	>14NC	total
ddH2O	0	21	0	21
MLN8054	0	20	0	20
X9	<14NC	14NC	>14NC	total
ddH2O	1	10	8	19
MLN8054	0	11	7	18

## Sheet: Figure 8
WT	<14NC	14NC	>14NC	total
ddH2O	0	21	0	21
trbl mRNA	19	7	0	26
trbl RNAi	0	9	0	9
X9	<14NC	14NC	>14NC	total
ddH2O	1	10	8	19
trbl mRNA	15	10	2	27
trbl RNAi	4	9	21	34

## Sheet: Figure S2
	Embryo	Larvae	Pupae	Adult
PpV/ovo x FM7/Y	100	0	0	0
FM7/+ x FM7/Y	100	99	96	89
X9/FM7 x FM7/Y	100	89	67	54

## Sheet: Segregation defects
WT	mitosis	Nr nuclei scored	segregation defects		total	defects	proportion
Embryo1	m13	151	1		349	4	0.0114613
Embryo2	m13	76	2
Embryo3	m13	122	1
X9 14 divisions
Embryo1	m14	65	7		533	47	0.0881801
Embryo2	m14	67	5
Embryo3	m14	194	4
Embryo4	m14	53	4
Embryo5	m14	49	2
Embryo6	m14	19	10
Embryo7	m14	16	5
Embryo8	m14	70	10
X9 13 divisions
Embryo1	m13	51	9		532	45	0.0845865
Embryo2	m13	77	8
Embryo3	m13	56	4
Embryo4	m13	50	7
Embryo5	m13	31	0
Embryo6	m13	74	8
Embryo7	m13	33	1
Embryo8	m13	53	2
Embryo9	m13	53	4
Embryo10	m13	54	2
